# Supplementary material for: Homogeneous-like photocatalysis: covalent immobilization of an iridium(III) complex onto polystyrene brushes grafted on SiO2 nanoparticles as a mass/charge transfer-enhanced platform
Source: Royal Society of Chemistry journal article supplement (doi:10.1039/d3dt03903j), 2024-01-01

## Supporting Information

### Homogeneous-like photocatalysis: covalent immobilization of iridium (III) complex to polystyrene brushes grafted on SiO<sub>2</sub> nanoparticles as a mass/charge transfer-enhanced platform

Shaoqi Chen, Yang Zhou, Xuebing Ma\*

<sup>a</sup>College of Chemistry and Chemical Engineering, Southwest University, Chongqing, 400715, P. R. China

\* Corresponding author's email: [zcyj23@swu.edu.cn](mailto:zcyj23@swu.edu.cn)

# Table of contents

|                                                                                         |        |
|-----------------------------------------------------------------------------------------|--------|
| 1. Preparation of raw materials.....                                                    | S2–4   |
| 1.1. CPDB@SiO <sub>2</sub> NPs                                                          |        |
| 1.2. Hollow mesoporous polystyrene nanospheres (HMPNs)                                  |        |
| 1.3. TRIP                                                                               |        |
| 2. Cleavage of PVBC brushes grafted on the surface of PVBC@SiO <sub>2</sub> NPs.....    | S4–6   |
| 3. Determination of loading benzyl chloride moiety in HMPNs.....                        | S6     |
| 4. Characterization of PVBC@SiO <sub>2</sub> NPs and Ir#PVBC@SiO <sub>2</sub> NPs ..... | S6–11  |
| 4.1. Thermogravimetric analysis                                                         |        |
| 4.2. Morphology and particle size                                                       |        |
| 4.3. UV–vis absorption spectra                                                          |        |
| 4.4. Uv–Vis DRS                                                                         |        |
| 4.5. Emission lifetime                                                                  |        |
| 4.6. Quantum yield                                                                      |        |
| 5. Kinetics of reaction process.....                                                    | S11–12 |
| 6. <sup>1</sup> H NMR spectra of products.....                                          | S12–20 |

## 1. Preparation of raw materials

### 1.1. CPDB@SiO<sub>2</sub> NPs

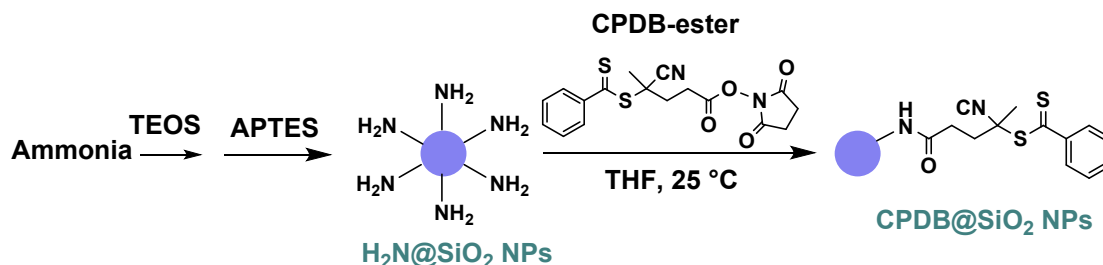

#### 1.1.1 H<sub>2</sub>N@SiO<sub>2</sub> NPs

Anhydrous ethanol (110 mL) and ammonia (5.7 mL, 28 %wt) were added to a 250 mL two-neck flask, then stirred and heated to 35 °C. The ethanol solution (7.8 mL) containing TEOS (3.8 mL) was added to the system with a peristaltic pump (1.3 mL min<sup>-1</sup>). After the reaction was carried out for 24 h under stirring, APTES (2.4 mL) was added dropwise (1.0 mL min<sup>-1</sup>), stirred at 35 °C for 12 h, naturally cooled to room temperature. The isolated solids by centrifugation (1.3 × 10<sup>4</sup> rpm, 5 min) were washed by anhydrous ethanol (54 mL × 3), pumped with an oil pump for 0.5 h, and dried at 45 °C for 2 h under vacuum to obtain white powder solid H<sub>2</sub>N@SiO<sub>2</sub> NPs ( 1.1 g ).

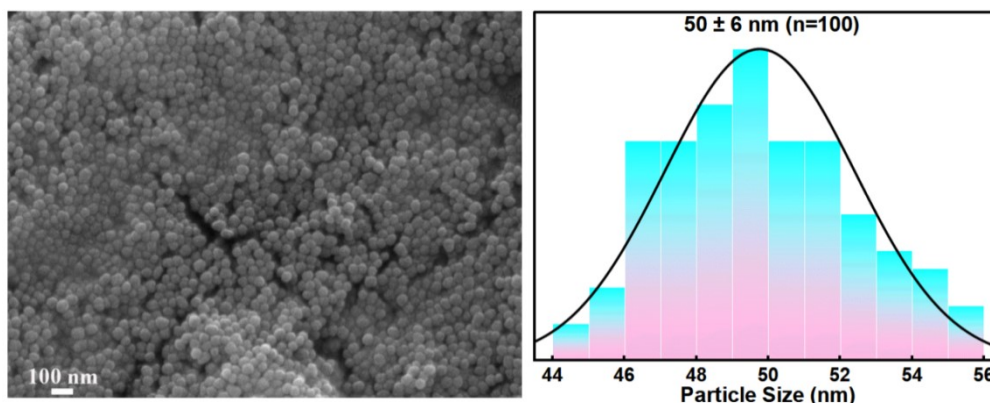

**Fig.S1** SEM image (left) and particle size distribution (right) of H<sub>2</sub>N@SiO<sub>2</sub> NPs.

### 1.1.2. CPDB@SiO<sub>2</sub> NPs

12 mL of THF solution containing CPDB-ester (97 mg, 0.26 mmol) and 12 mL of THF suspension of H<sub>2</sub>N@SiO<sub>2</sub> NPs (1.2 g, stirred at room temperature for 4 h) were added to an Ar-filled dry three-necked flask (50 mL) and stirred at 25 °C for 24 h. After a mixed solution (50 mL) of cyclohexane and ether ( $v_1/v_2 = 4/1$ ) was added and stirred for 10 min, the solids were isolated by centrifugation. The obtained solids were stirred in 20 mL of THF, and added a mixed solvent of cyclohexane and ether ( $v_1/v_2 = 4/1$ ) (50 mL), and then centrifuged (9000 rpm, 1 min). Repeat the above operation until the upper centrifugate was colorless and transparent. The solids were dried in vacuum at 25 °C to obtain a light pink powder solid CPDB@SiO<sub>2</sub> (970 g).

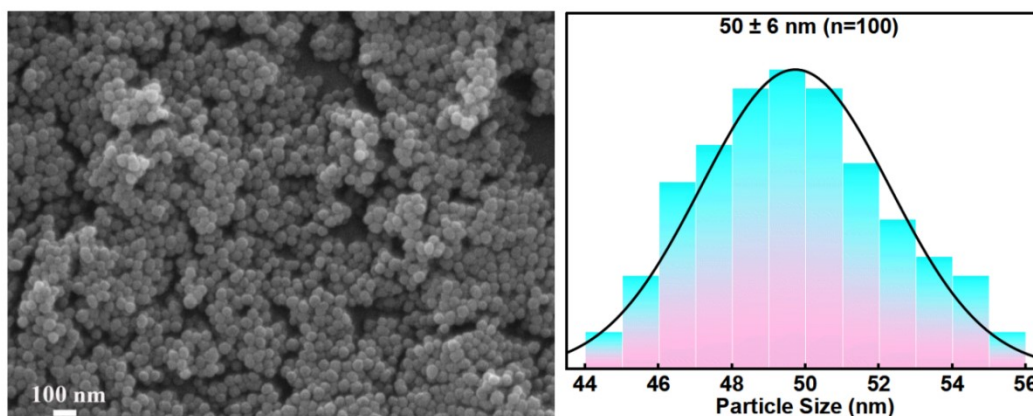

**Fig.S2** SEM image (left) and particle size distribution (right) of CPDB@SiO<sub>2</sub> NPs (b).

## 1.2. Hollow mesoporous polystyrene nanospheres (HMPNs)

### 1.2.1. Polystyrene nanospheres (PS NPs)

In an Ar-filled flask (500 mL), deionized water (180 mL), PVP (1.65 g, 0.03 mmol), and styrene (8.20 g, 0.08 mol) were added and stirred at room temperature for 15 min. Then KPS (0.45 g, 1.67 mmol) in deionized water (9 mL) was added, stirred at room temperature for 15 min, and heated to 85 °C for 24 h. The isolated solids by centrifugation ( $1.3 \times 10^4$  rpm, 5 min) was washed with deionized water (30 mL  $\times$  2) and anhydrous ethanol (30 mL  $\times$  2) until the supernatant was colorless and transparent, and dried at 45 °C for 6h to afford

white solid powder PS NPs (6.50 g).

### 1.2.2. Hollow mesoporous nanospheres(HMPNs)

PS NPs (400 mg) in aqueous solution (20 mL) containing 0.5 wt % PVA were stirred for 24 h to afford PS NPs suspension. Under the protection of Ar, aqueous solution (20 mL) containing 0.5 wt % PVA, styrene (208 mg, 2.00 mmol), VBC (153 mg, 1.00 mmol) and F127 (500 mg, 0.04 mmol) were added to a three-necked flask (150 mL) and stirred at 25 °C for 5 min. The above PS NPs suspension was added and stirred at 25 °C for 4 h. Then KPS aqueous solution (8 mL, 70 mg, 0.26 mmol) was added and heated to 65 °C for 80 min. Afterwards, styrene (104 mg, 1.00 mmol), VBC (153 mg, 1.00 mmol) and DVB (130 mg, 1.00 mmol) were added successively, and the temperature was raised to 75 °C for 24 h. After being cooled and centrifugated ( $1.3 \times 10^4$  rpm, 5 min), the isolated solids were washed with distilled water (20 mL  $\times$  3) and anhydrous ethanol until the supernatant was colorless, clear and transparent. The obtained core-shelled solids were stirred at 25 °C in a mixed solvent (30 mL) including THF and ethanol ( $v/v = 1:1$ ) for 12 h. The solids were centrifuged ( $1 \times 10^4$  rpm, 5 min), and stirred at 65 °C in another mixed solvent (30 mL) including ethanol and acetone ( $v/v = 1:1$ ) for 12 h. The isolated solids were dried naturally to afford white solid HMPNs (0.32 g).

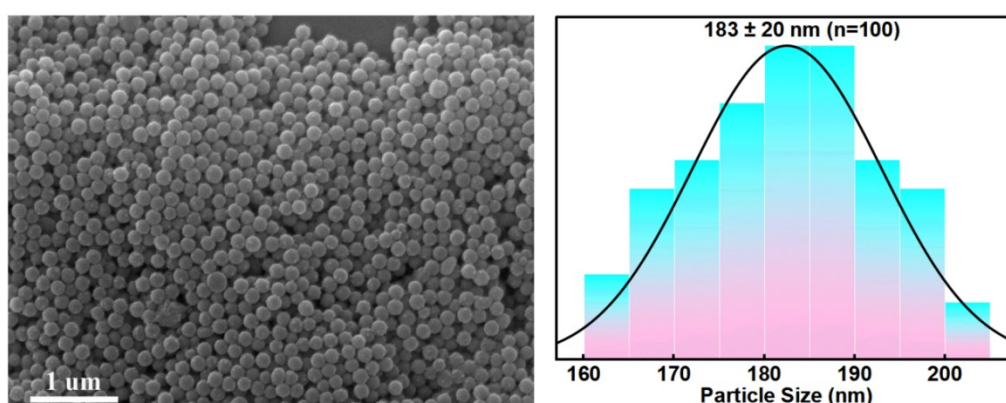

**Fig.S3** SEM image (left) and particle size distribution (right) of HMPNs.

## 2. Cleavage of PVBC brushes grafted on the surface of PVBC@SiO<sub>2</sub> NPs

In N<sub>2</sub>-filled dry round-bottom flask (100 mL), PVBC@SiO<sub>2</sub> NPs (250 mg) and anhydrous

ethanol solution (50 mL) containing  $\text{NH}_4\text{I}$  (150 mg) were charged and sonicated for 2h, and heated to 75 °C. After being stirred for 2 h, hydrazine hydrate (500 mg) was added, stirred for 24 h, and cooled to room temperature. The solids was isolated by centrifugation and washed by THF (5 mL  $\times$  3). To the combined solutions, deionized water (150 mL) was added and extracted by  $\text{CHCl}_3$  (20 mL  $\times$  3). The combined  $\text{CHCl}_3$  phases was washed by deionized water (20 mL), filtered through filter head (0.22  $\mu\text{m}$ ), and evaporated under reduced pressure, affording light yellow viscous oily liquid. Their molecular weights ( $M_n$ ) and polymer dispersity index (PDI) are determined using a Waters gel-permeation chromatograph (GPC).

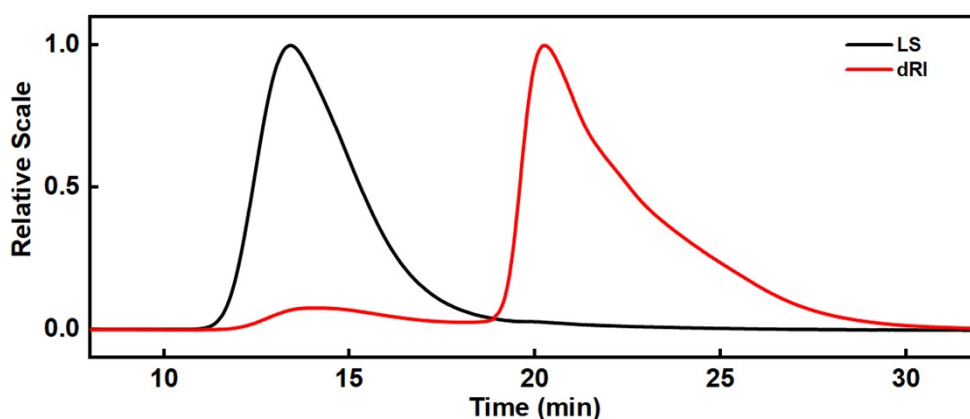

| Concentration Source | Solvent | Mp (Daltons) | Mw (Daltons) | Mn (Daltons) | PDI   |
|----------------------|---------|--------------|--------------|--------------|-------|
| RI                   | THF     | 42808        | 31710        | 18120        | 1.753 |

**Fig.S4** GPC spectrum of cleaved PVBC brush from PVBC(SS)@SiO<sub>2</sub> NPs.

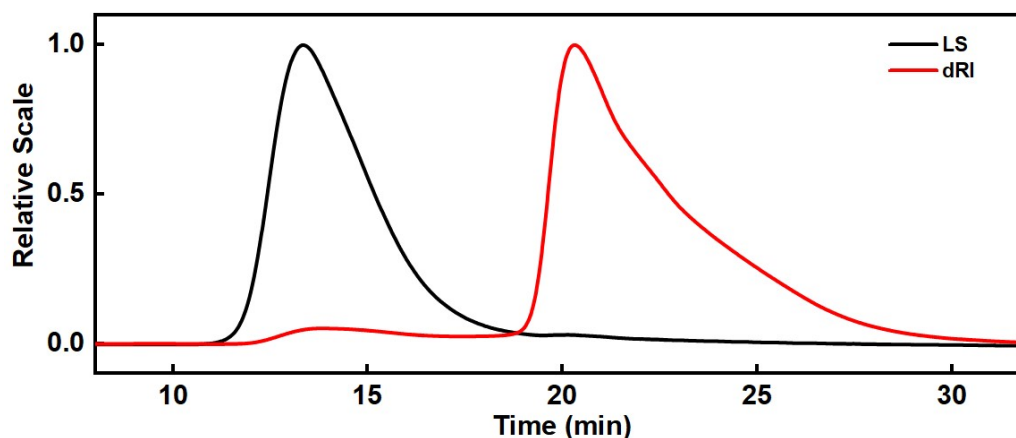

| Concentration Source | Solvent | Mp (Daltons) | Mw (Daltons) | Mn (Daltons) | PDI   |
|----------------------|---------|--------------|--------------|--------------|-------|
| RI                   | THF     | 79051        | 55281        | 27920        | 1.982 |

**Fig.S5** GPC spectrum of cleaved PVBC brush from PVBC(SL)@SiO<sub>2</sub> NPs.

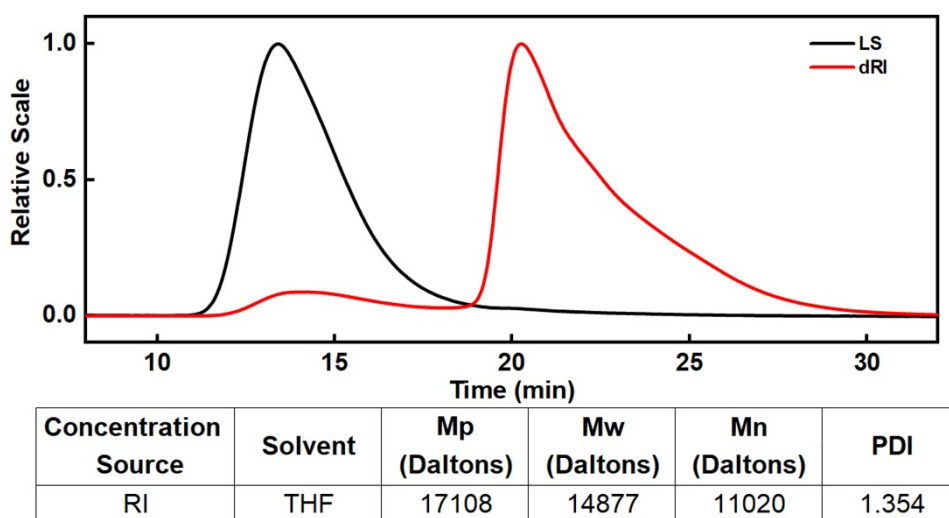

**Fig.S6** GPC spectrum of cleaved PVBC brush from PVBC(DS)@SiO<sub>2</sub> NPs.

### 3. Determination of loading benzyl chloride moiety in HMPNs

In round-bottom flask (10 mL), HMPNs (300 mg) and THF (2 mL) were charged and sonicated for 30 min. To the suspension, aqueous NaOH solution (5 mL, 1.0 mol L<sup>-1</sup>) was added, heated to 40 °C for 12 h, evaporated under reduced pressure to remove THF, and filtered using filter head (0.22 μm). Diluted nitric acid was used to adjust the filtrate to pH = 7, and K<sub>2</sub>CrO<sub>4</sub> (1 mL 0.5 %wt) was added. The obtained solution was titrated with standard AgNO<sub>3</sub> (0.1mmol mL<sup>-1</sup>) solution until brick red appears. This titration process was repeated three times. The content of benzyl chloride moiety in HMPNs was calculated to be 3.8 mmol g<sup>-1</sup>.

### 4. Characterization of PVBC@SiO<sub>2</sub> NPs and Ir#PVBC@SiO<sub>2</sub> NPs

#### 4.1. Thermogravimetric analysis



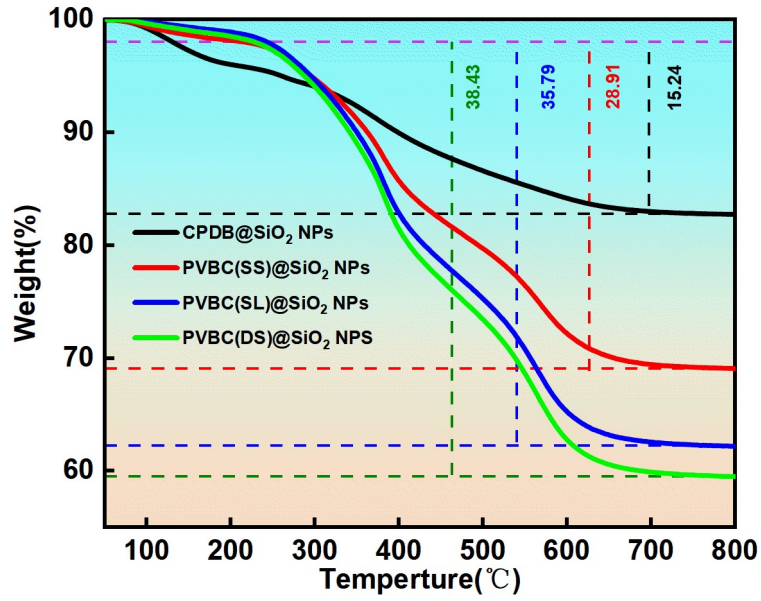

**Fig.S7** Thermogravimetric curves of PVBC@SiO<sub>2</sub> NPs.

#### 4.2. Morphology and particle size

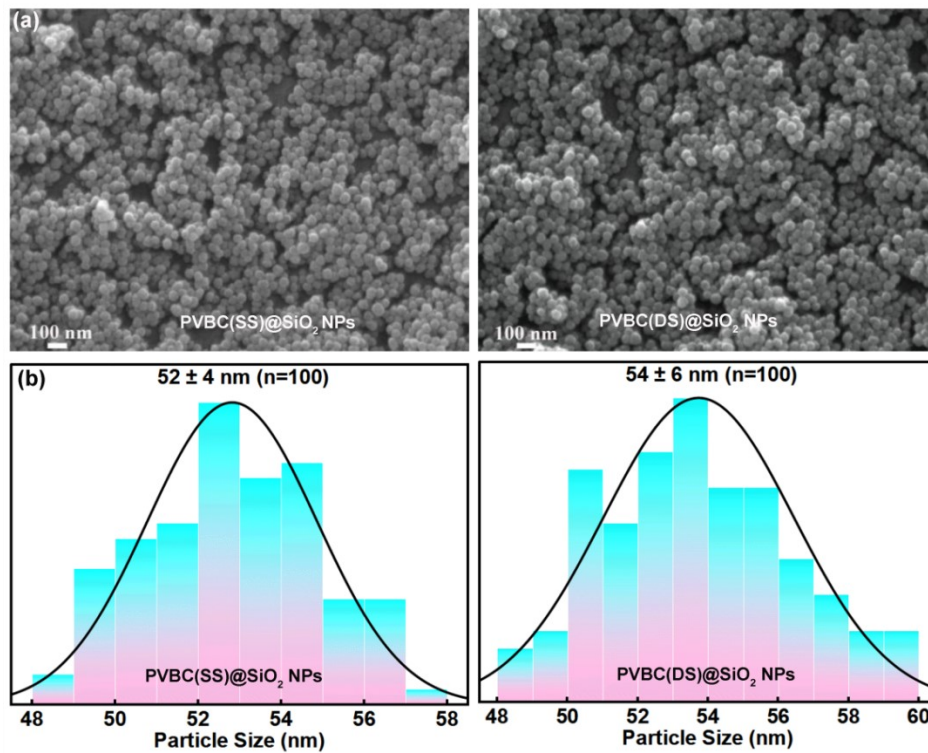

**Fig.S8** SEM images (a) and particle size distributions (b) of PVBC(SS)@SiO<sub>2</sub> NPs and PVBC(DS)@SiO<sub>2</sub> NPs.



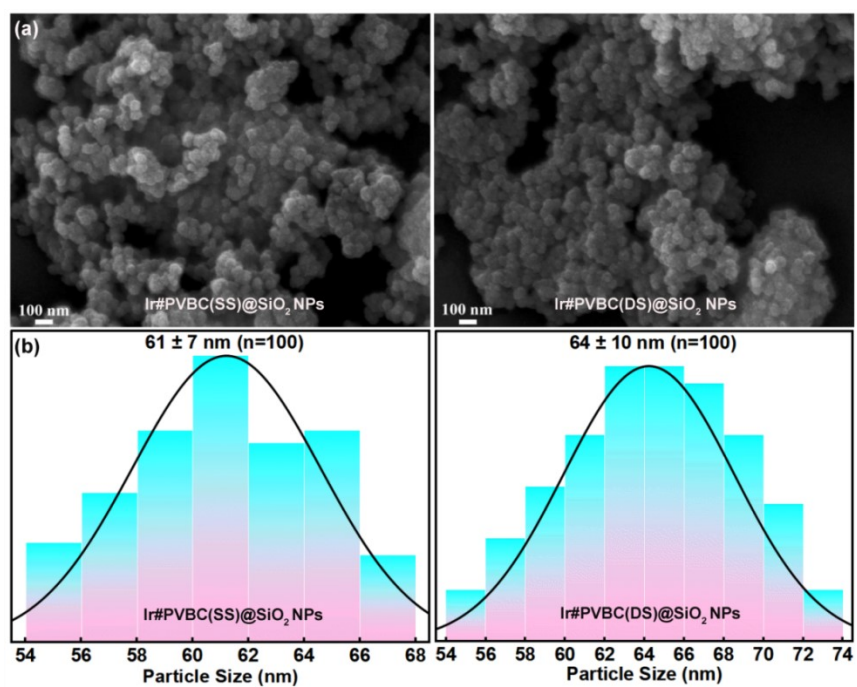

**Fig.S9** SEM images (a) and particle size distributions (b) of Ir#PVBC(SS)@SiO<sub>2</sub> NPs and Ir#PVBC(DS)@SiO<sub>2</sub> NPs.

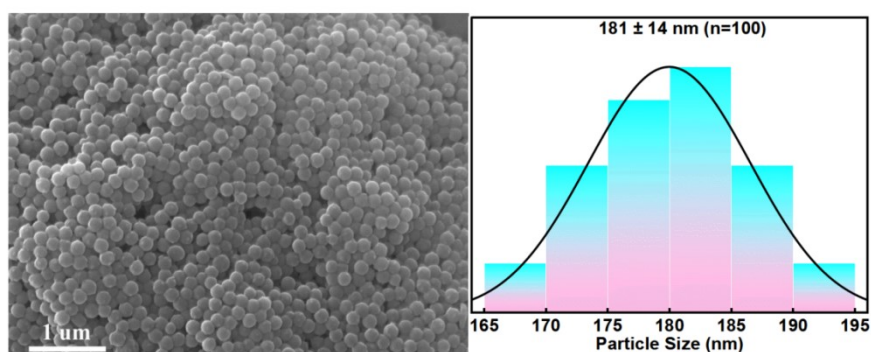

**Fig.S10** SEM images (left) and particle size distributions (right) of Ir#HMPNs.

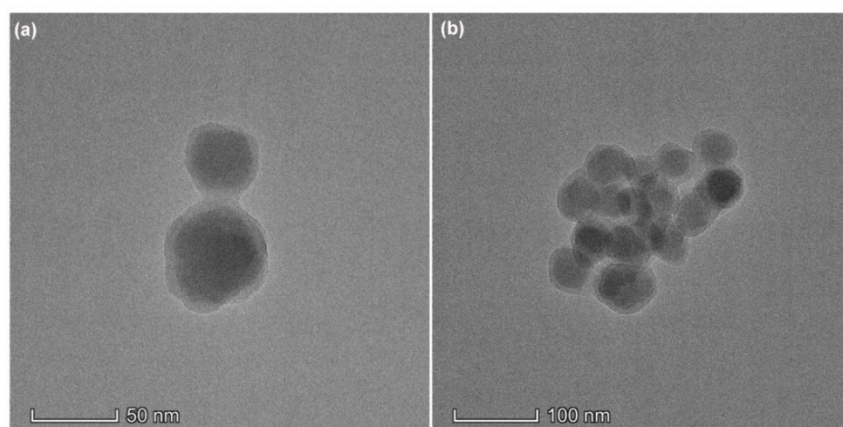

**Fig.S11** TEM images of PVBC(SL)@SiO<sub>2</sub> NPs (a) and Ir#PVBC(SL)@SiO<sub>2</sub> NPs (b).

### 4.3. UV-vis absorption spectra

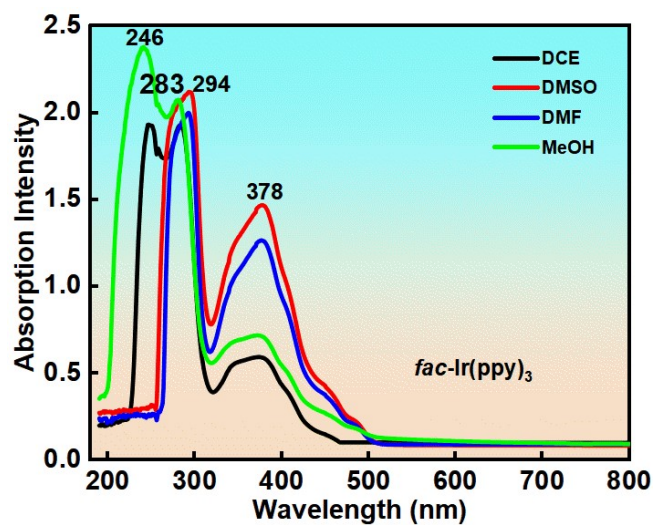

Fig. S12 UV-vis absorption spectra of *fac*-Ir(ppy)<sub>3</sub>.

### 4.4. UV-Vis DRS

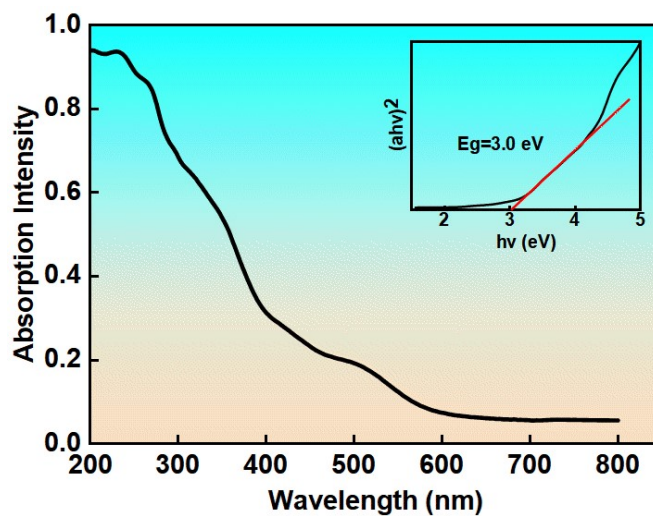

Fig.S13 UV-Vis DRS of PVBC(SL)@SiO<sub>2</sub> NPs.

### 4.5. Emission lifetime

The fluorescent lifetimes of all samples were determined by using time-correlated single-photon counting (TCSPC) in solid state. Their average emission lifetimes were calculated according to the following equation:

$$\tau_{ave} = \frac{B_1\tau_1^2 + B_2\tau_2^2 + B_3\tau_3^2}{B_1\tau_1 + B_2\tau_2 + B_3\tau_3}$$

Where  $\tau$  is the measured fluorescence lifetime and  $B$  is the amplitude. Fluorescence lifetimes including  $\tau_1$ ,  $\tau_2$ , and  $\tau_3$  are derived from first, second and third order fitting. Similarly,  $B_1$ ,  $B_2$ , and  $B_3$  are also obtained.

**Table S1.** Fluorescence lifetimes and amplitudes of *fac*-Ir(ppy)<sub>3</sub>, Ir#HMPNs and

| Sample                           | Ir#PVBC@SiO <sub>2</sub> NPs |                  |                  |       |       |       | $\tau_{ave}$<br>(ns) |
|----------------------------------|------------------------------|------------------|------------------|-------|-------|-------|----------------------|
|                                  | $\tau_1$<br>(ns)             | $\tau_2$<br>(ns) | $\tau_3$<br>(ns) | $B_1$ | $B_2$ | $B_3$ |                      |
| <i>fac</i> -Ir(ppy) <sub>3</sub> | 24.4                         | 142.1            | 436.6            | 0.27  | 0.41  | 0.30  | 335.7                |
| Ir#PVBC(SS)@SiO <sub>2</sub> NPs | 1.1                          | 11.7             | 37.1             | 0.26  | 0.44  | 0.30  | 37.1                 |
| Ir#PVBC(SL)@SiO <sub>2</sub> NPs | 1.7                          | 17.8             | 99.7             | 0.33  | 0.60  | 0.06  | 45.8                 |
| Ir#PVBC(DS)@SiO <sub>2</sub> NPs | 1.4                          | 12.1             | 36.6             | 0.23  | 0.44  | 0.34  | 28.7                 |
| Ir@HMPNs                         | 1.9                          | 12.9             | 79.8             | 0.30  | 0.65  | 0.05  | 33.5                 |

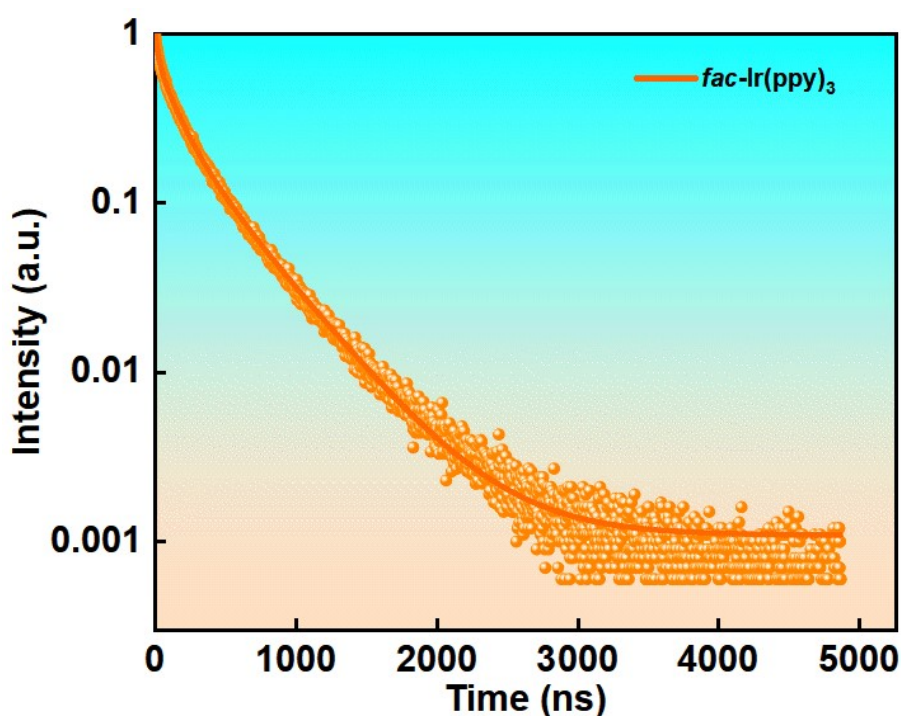

**Fig.S14** Time-resolved phosphorescence decays of *fac*-Ir(ppy)<sub>3</sub> (measured at 525 nm with

375 nm excitation).

#### 4.6. Quantum yield

Based on the fluorescence intensities in fluorescence spectra, the quantum yields of *fac*-Ir(ppy)<sub>3</sub>, Ir#HMPNs and Ir#PVBC(SS)@SiO<sub>2</sub> NPs were determined by FLS1000 steady state/transient state fluorescence spectrometer.

**Table S2** Quantum yields of *fac*-Ir(ppy)<sub>3</sub>, Ir#HMPNs and Ir#PVBC@SiO<sub>2</sub> NPs

| Sample                           | A     | Q(%) |
|----------------------------------|-------|------|
| <i>fac</i> -Ir(ppy) <sub>3</sub> | 0.073 | 41.8 |
| Ir#PVBC(SS)@SiO <sub>2</sub> NPs | 0.074 | 27.5 |
| Ir#PVBC(SL)@SiO <sub>2</sub> NPs | 0.074 | 36.5 |
| Ir#PVBC(DS)@SiO <sub>2</sub> NPs | 0.072 | 22.8 |
| Ir@HMPNs                         | 0.073 | 12.2 |

#### 5. Kinetics of reaction process

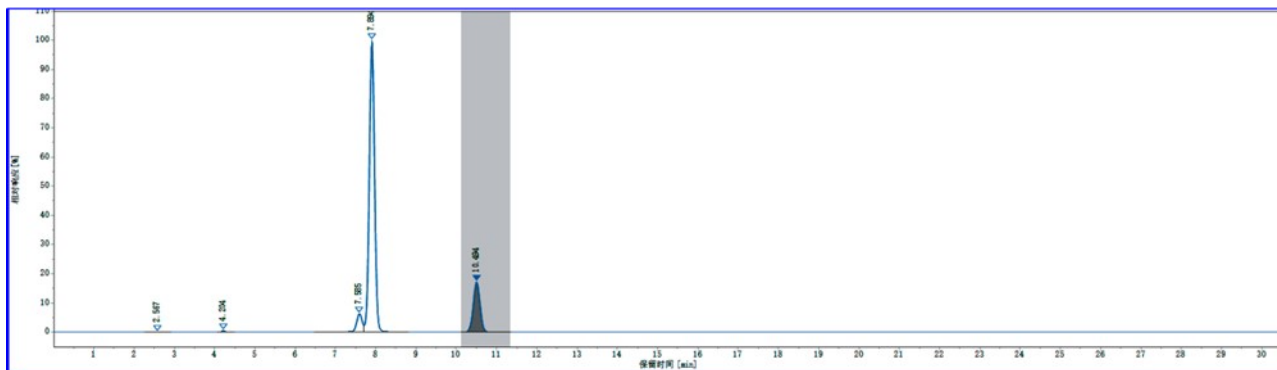

**Fig. S15.** HPLC spectrum of the reaction mixture in the Ir#PVBC(SL)@SiO<sub>2</sub>-promoted reductive cross-coupling reaction of benzaldehyde with *p*-phthalonitrile for 4 h (rate:0.5 mL min<sup>-1</sup>, V<sub>H2O</sub>/V<sub>H2N</sub>=50:50, C18 column).

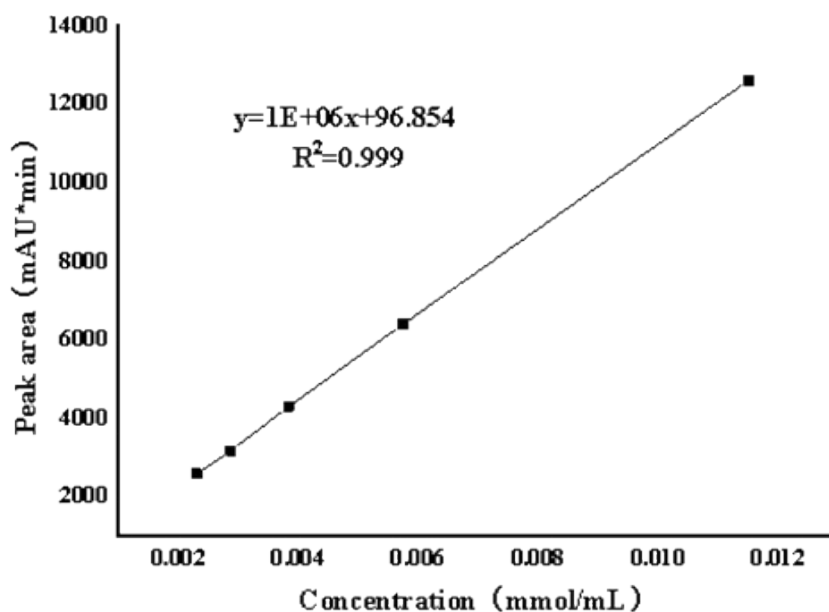

**Fig.S16** Standard curve taking product concentration as the X-axis and the peak area as the Y-axis.

**Table S3** Yields of benzhydrol in the reaction of benzaldehyde and *p*-phthalonitrile during the whole process

| Sample                           | Reaction time (min) |      |      |      |      |      |      |      |
|----------------------------------|---------------------|------|------|------|------|------|------|------|
|                                  | 45                  | 90   | 135  | 180  | 225  | 270  | 315  | 360  |
| <i>fac</i> -Ir(ppy) <sub>3</sub> | 22.5                | 39.7 | 52.5 | 63.9 | 73.2 | 80.6 | 84.0 | 85.0 |
| Ir#PVBC(SS)@SiO <sub>2</sub>     | 17.1                | 30.0 | 42.3 | 53.0 | 62.7 | 70.2 | 76.5 | 79.9 |
| Ir#PVBC(SL)@SiO <sub>2</sub>     | 20.3                | 36.6 | 49.2 | 61.0 | 71.0 | 78.6 | 83.3 | 85.0 |
| Ir#PVBC(DS)@SiO <sub>2</sub>     | 12.2                | 25.0 | 36.9 | 48.1 | 57.7 | 64.8 | 71.4 | 75.7 |
| Ir#HMPNs                         | 8.6                 | 17.2 | 27.4 | 36.4 | 44.5 | 50.7 | 50.2 | 60.2 |

Reaction conditions: benzaldehyde (0.2 mmol), *p*-phthalonitrile (0.3 mmol), and *N,N*-diisopropylethylamine (0.3 mmol) in DMSO (2 mL) at 25°C under blue light irradiation.

## 6. <sup>1</sup>H NMR spectra of products

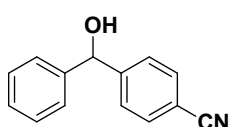

85% yield, colourless oil. <sup>1</sup>H NMR (600 MHz, CDCl<sub>3</sub>): δ 7.53 (d, *J* = 8.3 Hz, 2H), 7.43 (d, *J* = 8.1 Hz, 2H), 7.34-7.20 (m, 5H), 5.77 (s, 1H), 2.49 (br s, 1H).

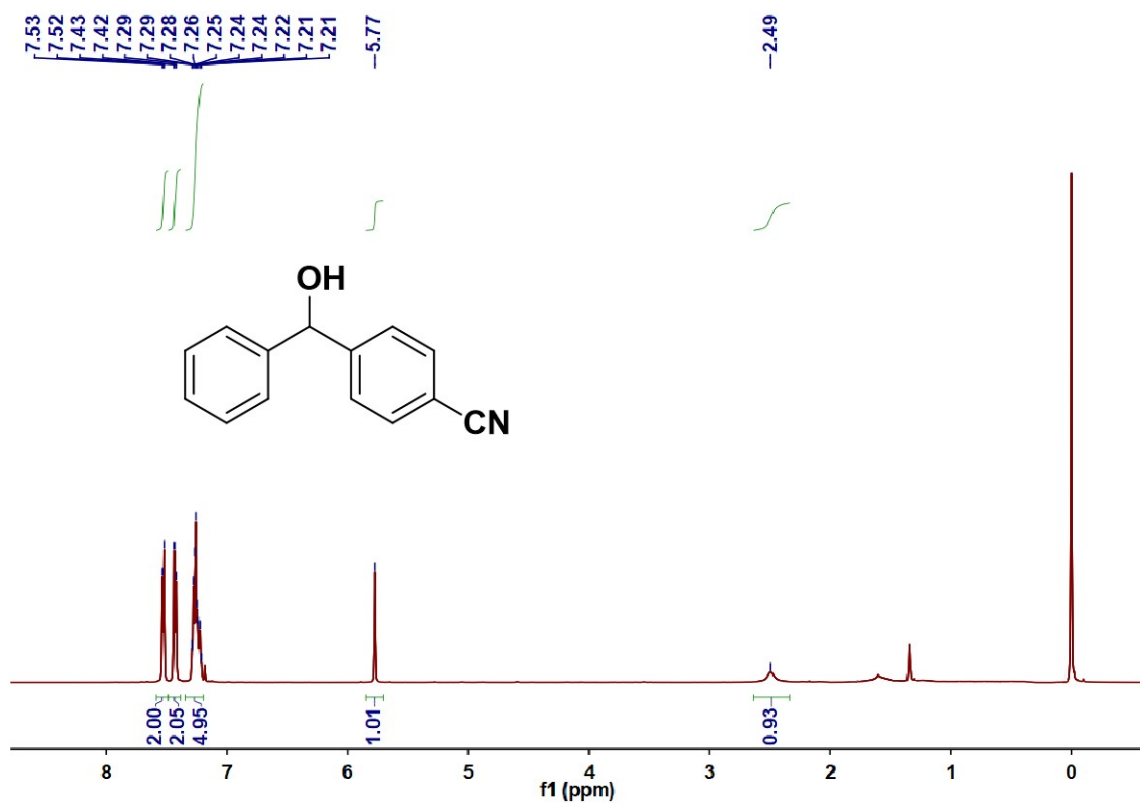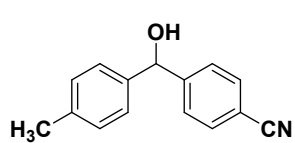

94% yield, colourless oil. <sup>1</sup>H NMR (600 MHz, CDCl<sub>3</sub>): δ 7.52 (d, *J* = 8.2 Hz, 2H), 7.42 (d, *J* = 8.3 Hz, 2H), 7.13 (d, *J* = 8.0 Hz, 2H), 7.08 (d, *J* = 8.0 Hz, 2H), 5.74 (s, 1H), 2.39 (br s, 1H), 2.26 (s, 3H).

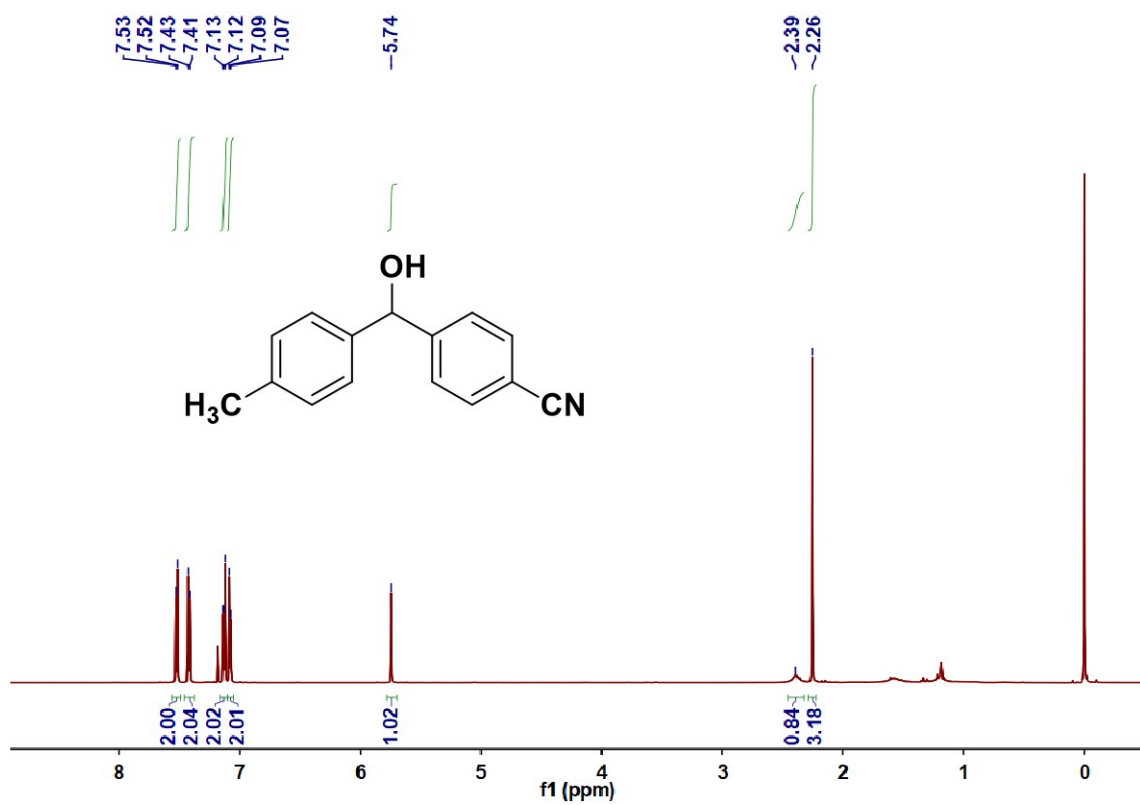

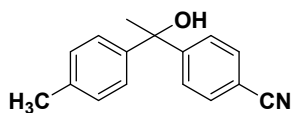

89% yield, colourless oil.  $^1\text{H NMR}$  (600 MHz,  $\text{CDCl}_3$ ):  $\delta$  7.50 (d,  $J = 8.4$  Hz, 2H), 7.45 (d,  $J = 8.4$  Hz, 2H), 7.19 (d,  $J = 8.4$  Hz, 2H), 7.07 (d,  $J = 8.0$  Hz, 2H), 2.25 (d, 4H), 1.85 (s, 3H).

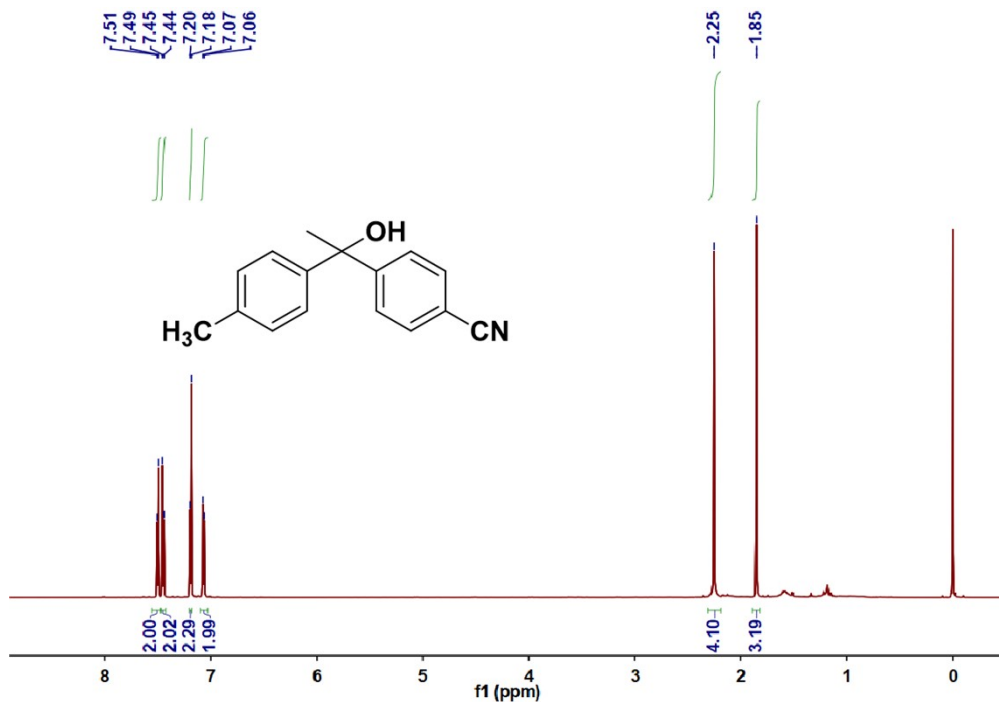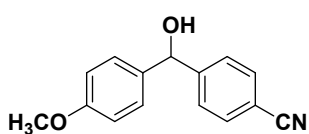

86% yield, colourless oil.  $^1\text{H NMR}$  (600 MHz,  $\text{CDCl}_3$ ):  $^1\text{H NMR}$  (600 MHz,  $\text{CDCl}_3$ )  $\delta$  7.53 (d,  $J = 8.3$  Hz, 2H), 7.42 (d,  $J = 8.1$  Hz, 2H), 7.15 (d,  $J = 8.6$  Hz, 2H), 6.79 (d,  $J = 8.7$  Hz, 2H), 5.73 (s, 1H), 3.71 (s, 3H), 2.49 (br s, 1H).

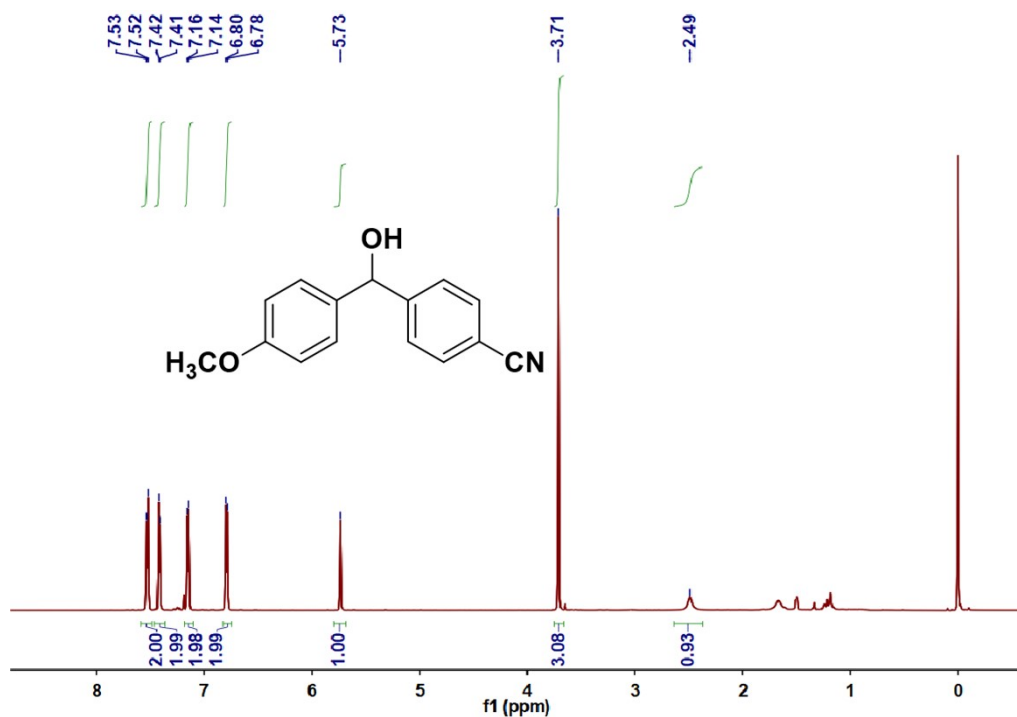



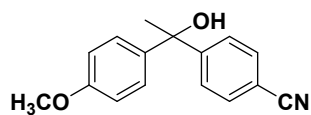

77% yield, colourless oil.  $^1\text{H NMR}$  (600 MHz,  $\text{CDCl}_3$ ):  $\delta$  7.50 (d,  $J = 8.6$  Hz, 2H), 7.44 (d,  $J = 8.6$  Hz, 2H), 7.21 (dd,  $J = 6.9, 2.0$  Hz, 2H), 6.82 – 6.74 (m, 2H), 3.71 (s, 3H), 2.31 (br s, 1H), 1.84 (s, 3H).

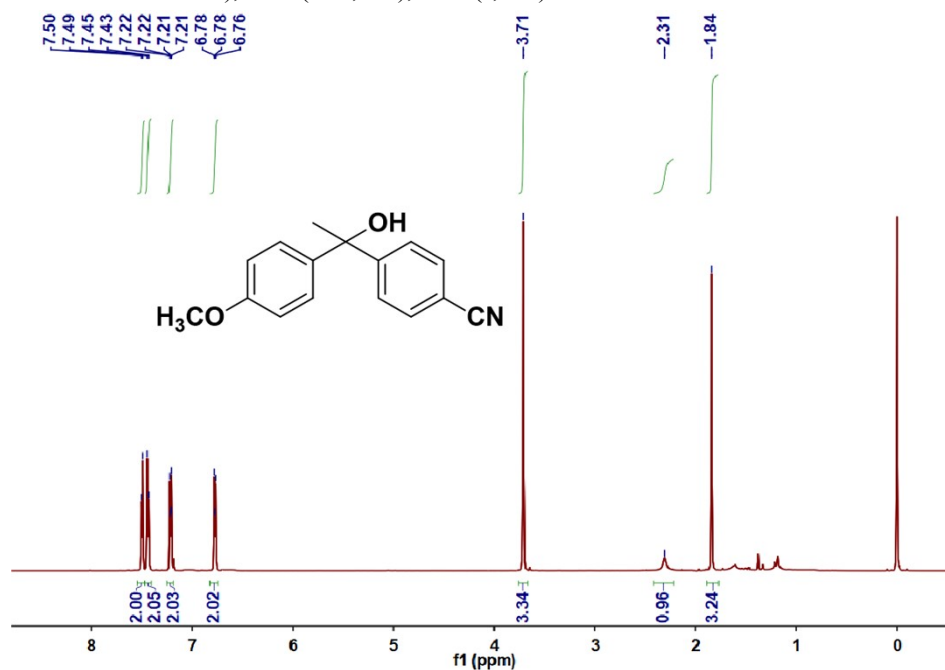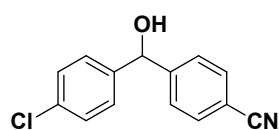

60% yield, colourless oil.  $^1\text{H NMR}$  (600 MHz,  $\text{CDCl}_3$ ):  $\delta$  7.50 (d,  $J = 8.3$  Hz, 2H), 7.38 (d,  $J = 8.1$  Hz, 2H), 7.21 (d,  $J = 8.5$  Hz, 2H), 7.17 (d,  $J = 8.4$  Hz, 2H), 5.72 (s, 1H).

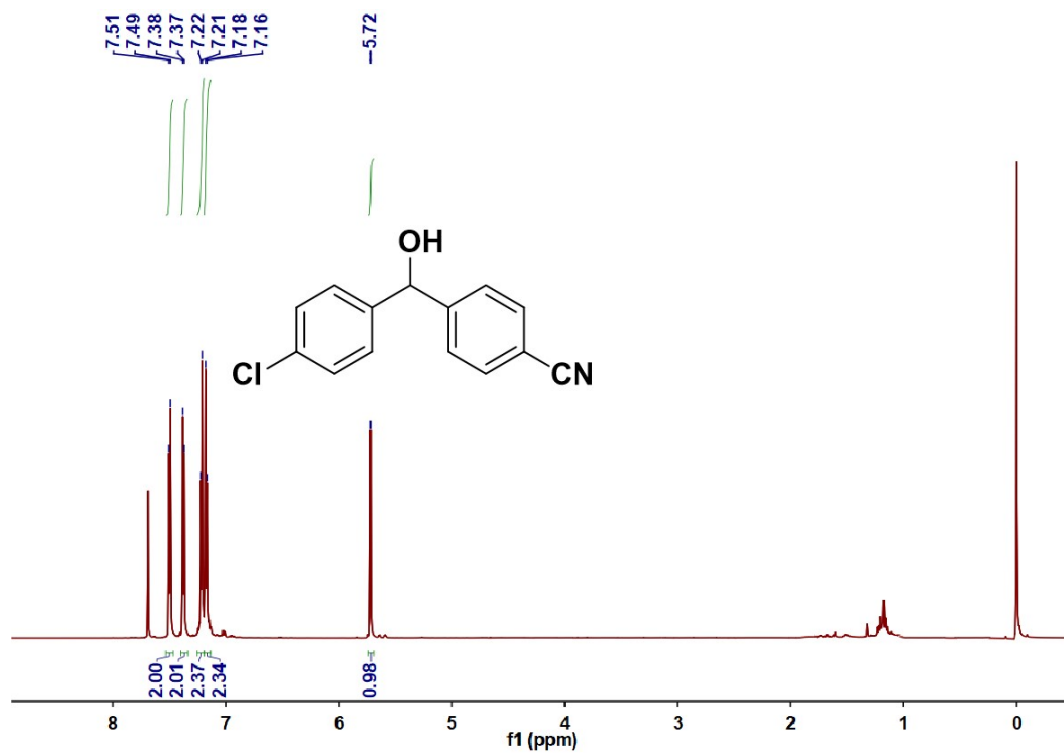

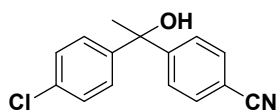

78% yield, colourless oil.  $^1\text{H NMR}$  (600 MHz,  $\text{CDCl}_3$ ):  $^1\text{H NMR}$  (600 MHz,  $\text{CDCl}_3$ )  $\delta$  7.52 (d,  $J = 8.2$  Hz, 2H), 7.44 (d,  $J = 8.2$  Hz, 2H), 7.25 (d,  $J = 8.5$  Hz, 2H), 7.22 (d,  $J = 8.6$  Hz, 2H), 2.30 (br s, 1H), 1.86 (s, 3H).

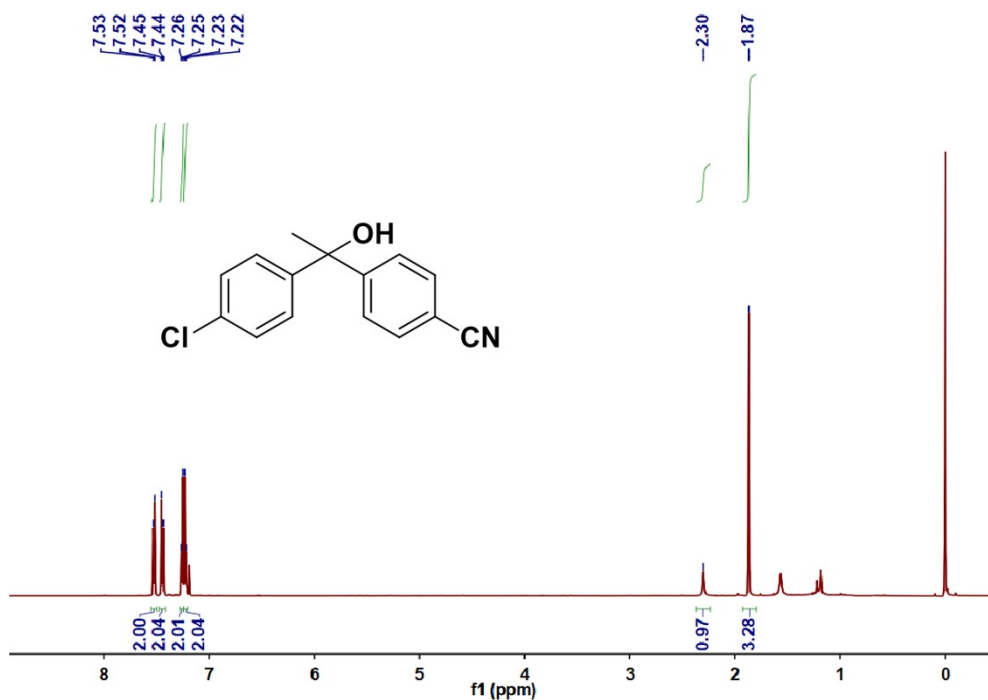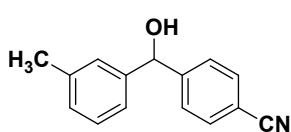

85% yield, colourless oil.  $^1\text{H NMR}$  (600 MHz,  $\text{CDCl}_3$ ):  $\delta$  7.54 (d,  $J = 8.2$  Hz, 2H), 7.43 (d,  $J = 8.2$  Hz, 2H), 7.17 (dd,  $J = 13.1, 5.5$  Hz, 1H), 7.10 – 7.00 (m, 3H), 5.74 (s, 1H), 2.36 (br s, 1H), 2.26 (s, 3H).

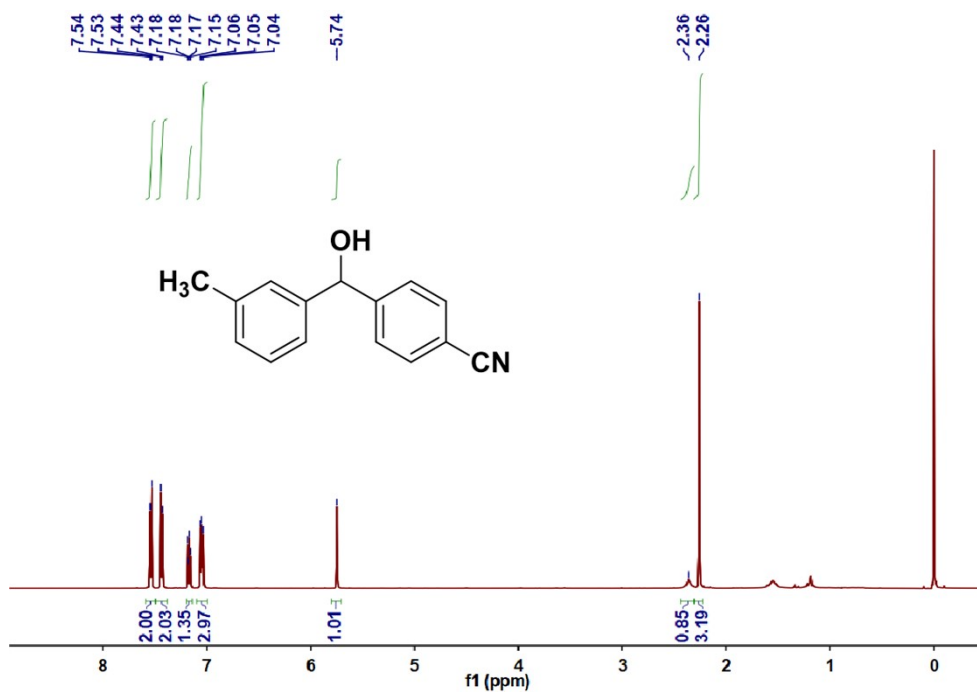

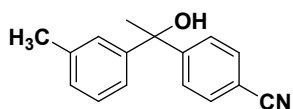

87% yield, colourless oil.  $^1\text{H NMR}$  (600 MHz,  $\text{CDCl}_3$ ):  $\delta$  7.51 (d,  $J = 8.2$  Hz, 2H), 7.46 (d,  $J = 8.2$  Hz, 2H), 7.13 (dt,  $J = 19.6, 7.5$  Hz, 3H), 7.01 (d,  $J = 7.1$  Hz, 1H), 2.25 (d,  $J = 12.0$  Hz, 4H), 1.86 (s, 3H).

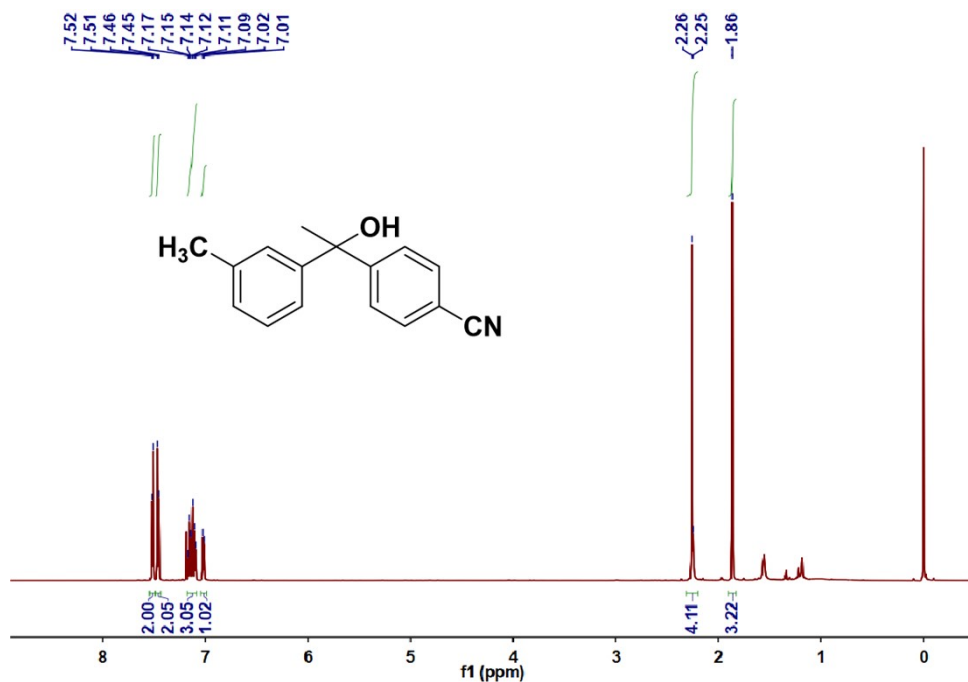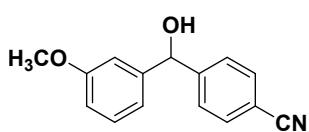

79% yield, colourless oil.  $^1\text{H NMR}$  (600 MHz,  $\text{CDCl}_3$ ):  $\delta$  7.54 (d,  $J = 8.1$  Hz, 2H), 7.44 (d,  $J = 8.0$  Hz, 2H), 7.19 (dd,  $J = 9.6, 6.1$  Hz, 1H), 6.85 – 6.79 (m, 2H), 6.78 – 6.73 (m, 1H), 5.75 (s, 1H), 3.71 (s, 3H).

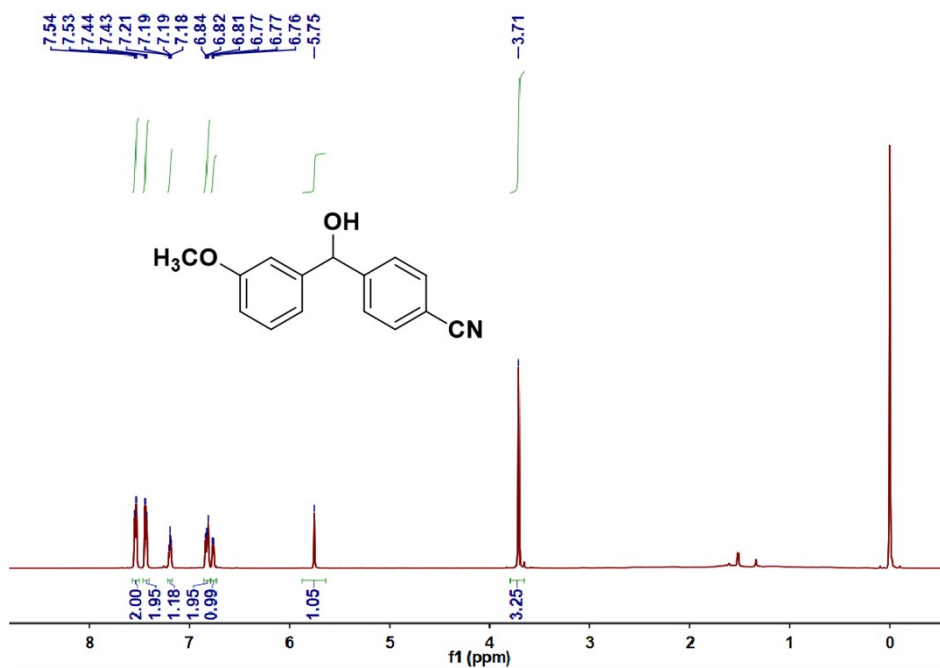

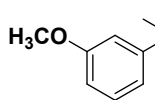

72% yield, colourless oil.  $^1\text{H NMR}$  (600 MHz,  $\text{CDCl}_3$ ):  $\delta$  7.54 – 7.47 (m, 2H), 7.45 (d,  $J = 8.2$  Hz, 2H), 7.16 (t,  $J = 8.0$  Hz, 1H), 6.91 – 6.82 (m, 2H), 6.72 (dd,  $J = 7.8, 2.1$  Hz, 1H), 3.69 (s, 3H), 2.52 (br s, 1H), 1.84 (s, 3H).

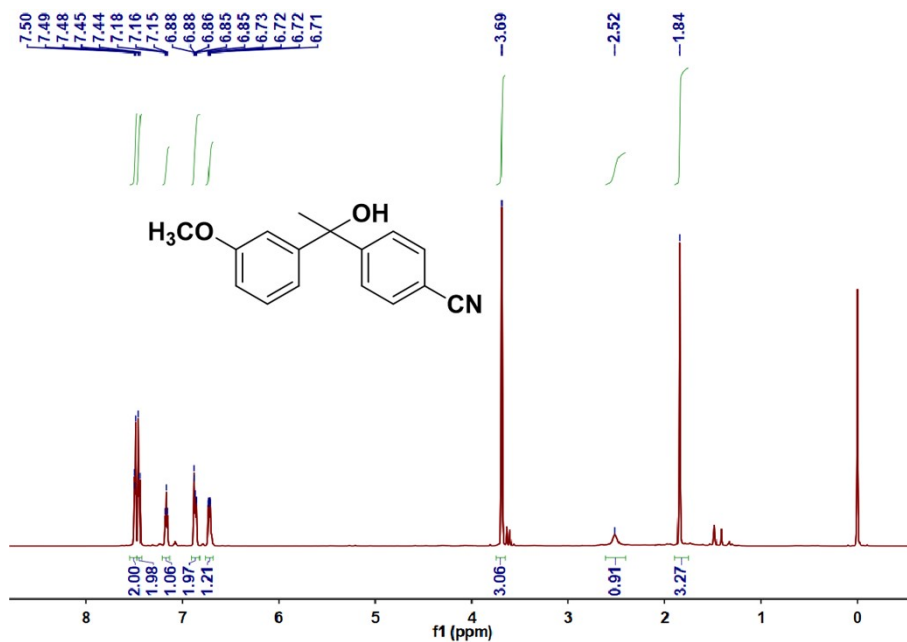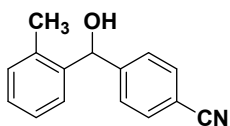

88% yield, colourless oil.  $^1\text{H NMR}$  (600 MHz,  $\text{CDCl}_3$ ):  $\delta$  7.53 (d,  $J = 8.2$  Hz, 2H), 7.38 (d,  $J = 8.1$  Hz, 2H), 7.30 – 7.22 (m, 1H), 7.18 – 7.12 (m, 2H), 7.12 – 7.07 (m, 1H), 5.97 (s, 1H), 2.21 (s, 3H).

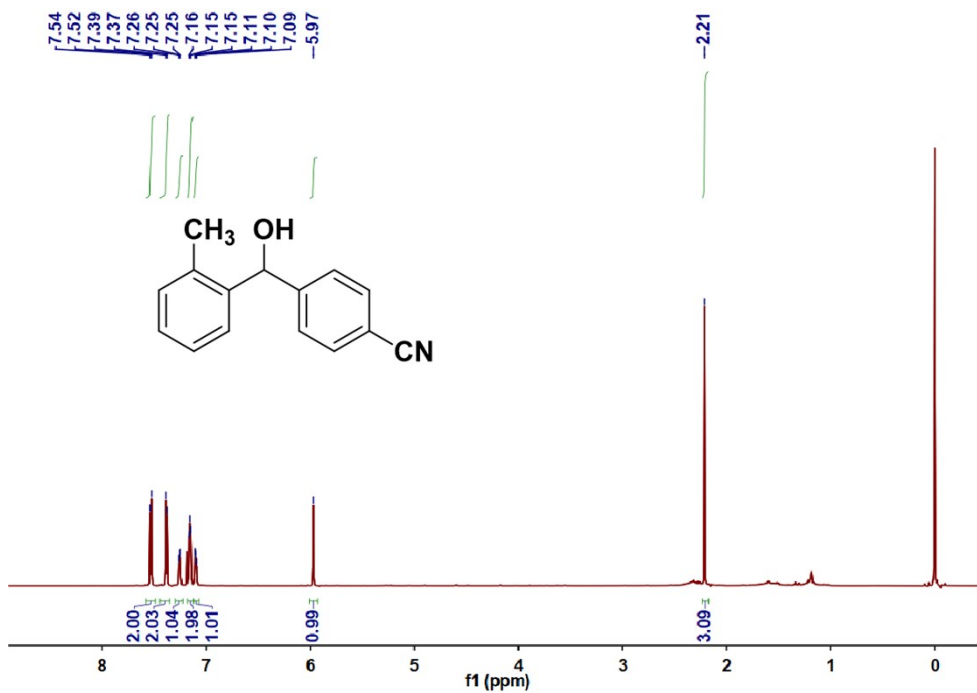

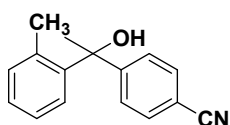

85% yield, colourless oil.  $^1\text{H NMR}$  (600 MHz,  $\text{CDCl}_3$ ):  $\delta$  7.55 (dd,  $J = 5.9, 3.2$  Hz, 1H), 7.49 (d,  $J = 8.3$  Hz, 2H), 7.35 (d,  $J = 8.3$  Hz, 2H), 7.18 (dd,  $J = 6.2, 2.7$  Hz, 2H), 7.08 – 7.02 (m, 1H), 2.17 (br s, 1H), 1.89 (s, 3H), 1.83 (s, 3H).

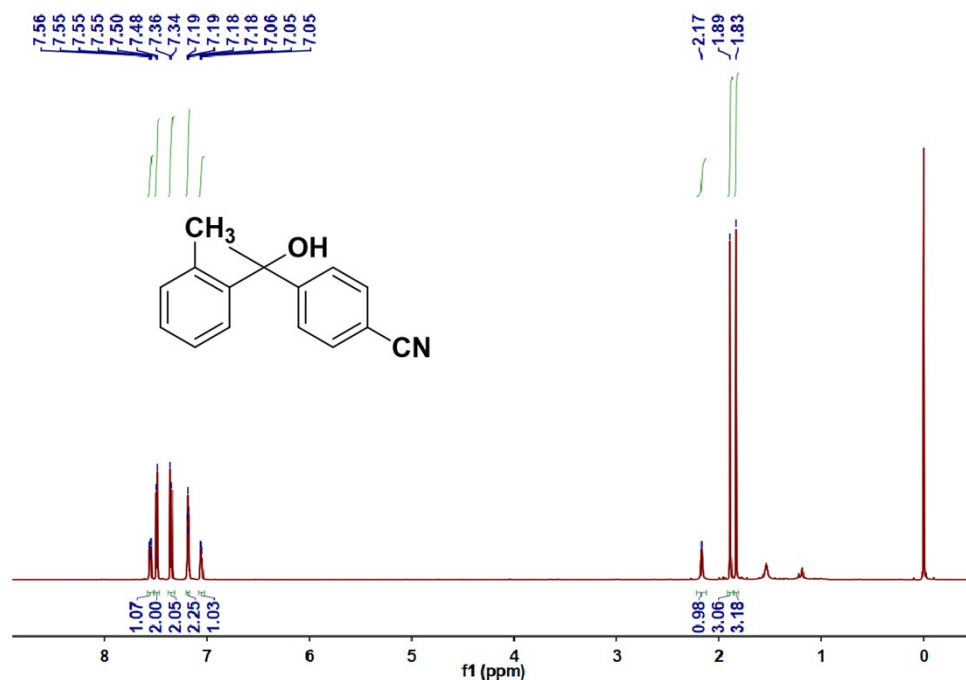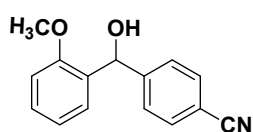

80% yield, colourless oil.  $^1\text{H NMR}$  (600 MHz,  $\text{CDCl}_3$ ):  $\delta$  7.51 (d,  $J = 8.3$  Hz, 2H), 7.42 (d,  $J = 8.1$  Hz, 2H), 7.26 – 7.19 (m, 1H), 7.13 (dd,  $J = 7.5, 1.1$  Hz, 1H), 6.88 (t,  $J = 7.5$  Hz, 1H), 6.82 (d,  $J = 8.2$  Hz, 1H), 5.98 (s, 1H), 3.72 (s, 3H), 3.08 (br s, 1H).

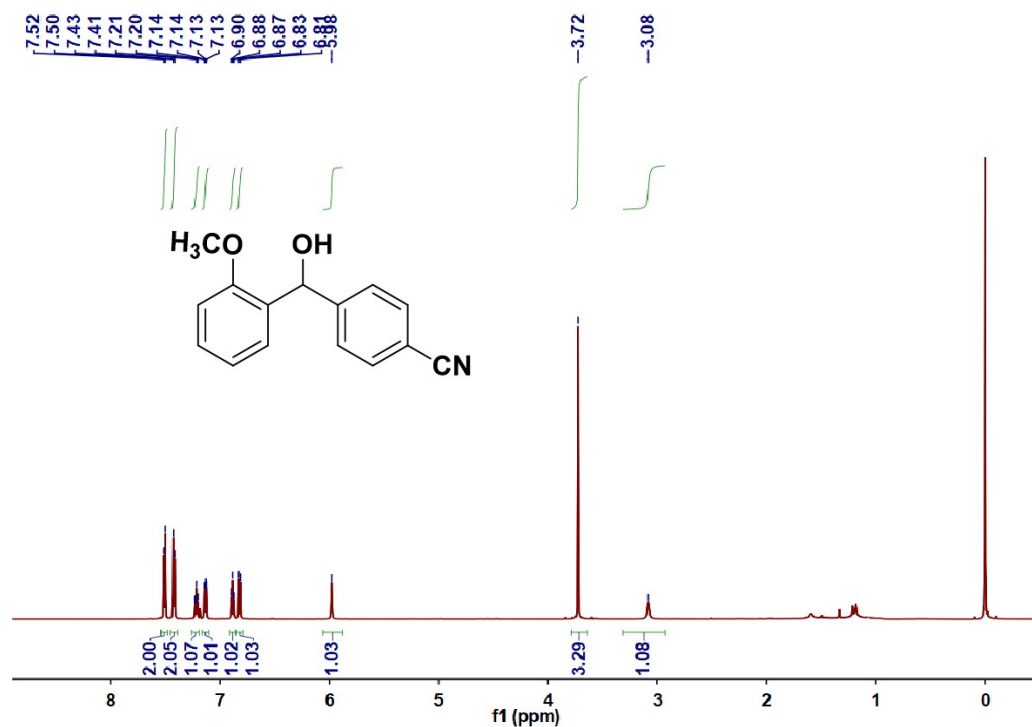

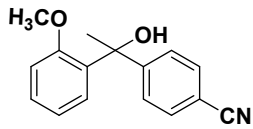

69% yield, colourless oil.  $^1\text{H NMR}$  (600 MHz,  $\text{CDCl}_3$ ):  $\delta$  7.46 (d,  $J = 8.2$  Hz, 2H), 7.39 (d,  $J = 7.6$  Hz, 1H), 7.33 (d,  $J = 8.2$  Hz, 2H), 7.26 (dd,  $J = 11.3, 4.2$  Hz, 1H), 6.98 (t,  $J = 7.5$  Hz, 1H), 6.81 (d,  $J = 8.1$  Hz, 1H), 4.51 (s, 1H), 3.51 (s, 3H), 1.73 (s, 3H).

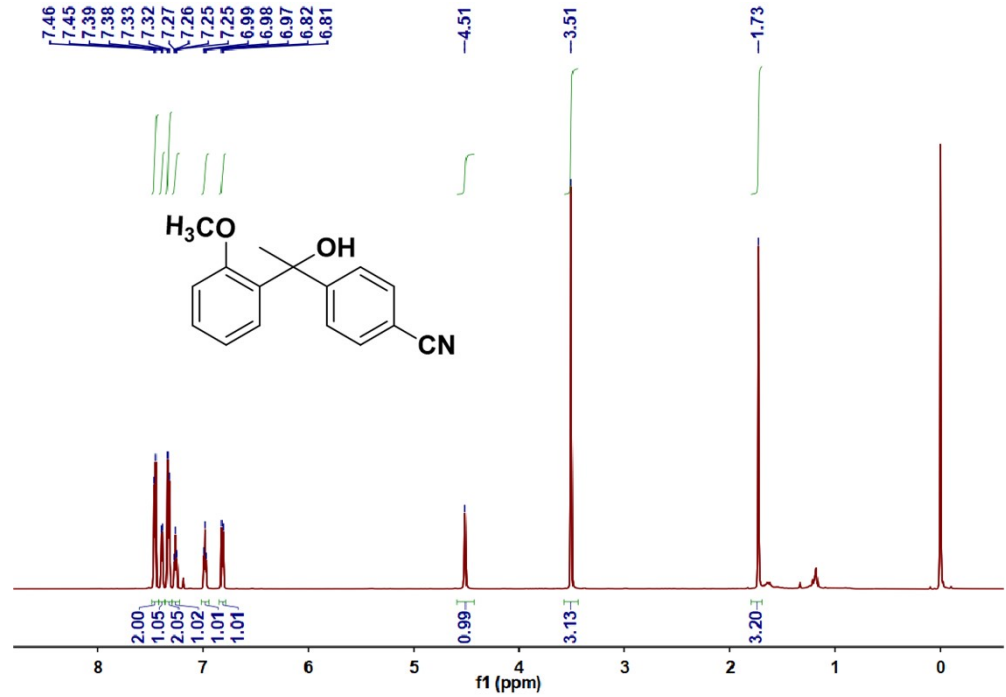

Supplement: d3dt03903j1.pdf [file d3dt03903j1.pdf]
